# Supplementary material for: Avoiding water reservoir effects in ALD of functional complex alkali oxides by using O3 as the oxygen source
Source: Royal Society of Chemistry journal article supplement (doi:10.1039/d1dt03960a), 2021-12-14
Supplement: d1dt03960a1.pdf [file d1dt03960a1.pdf]

# 'Electronic Supplementary Information

## **Avoiding water reservoir effects in functional complex alkali oxides by using O<sub>3</sub> as the oxygen source**

Henrik H. Sønsteby<sup>a,\*</sup>, Veronica A.-L. K. Killi<sup>a</sup>, Linn M. Rykkje<sup>a</sup>, Justin R. Bickford<sup>b</sup>, Eric G. Martin<sup>b</sup>, Robert C. Hoffman<sup>b</sup> and Ola Nilsen<sup>a,\*</sup>

<sup>a</sup> Department of Chemistry, University of Oslo, Blindern, 0315 Oslo, Norway

<sup>b</sup> U.S. Army Research Laboratory, 2800 Powder Mill Rd., Adelphi, Maryland 20783, USA

\*Corresponding e-mails: [henrik.sonsteby@kjemi.uio.no](mailto:henrik.sonsteby@kjemi.uio.no), [ola.nilsen@kjemi.uio.no](mailto:ola.nilsen@kjemi.uio.no)

## Supplementary Figure A:

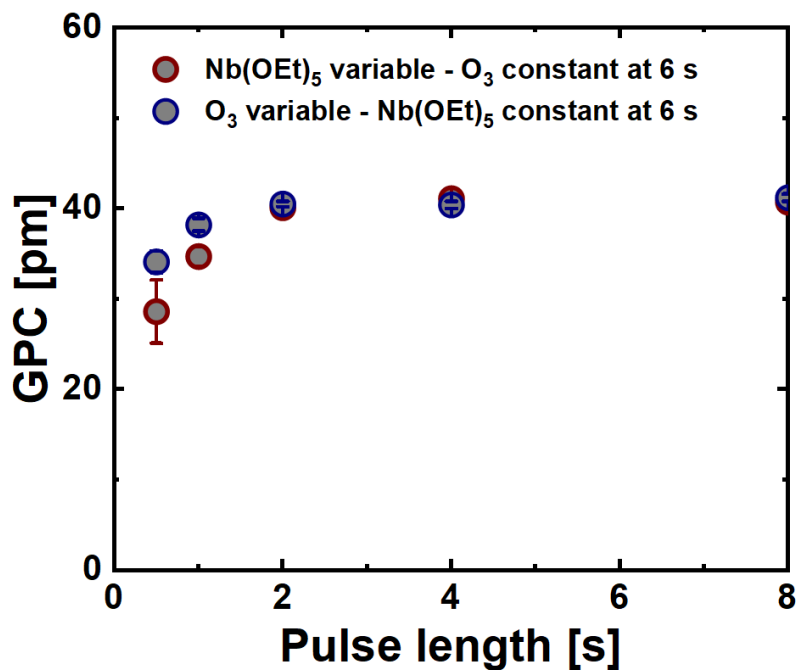

Supplementary Figure A: Growth per cycle (GPC) as a function of pulse length in seconds for  $\text{Nb(OEt)}_5$  and  $\text{O}_3$  in the ozone based process for  $\text{Nb}_2\text{O}_5$ .

## Supplementary Figure B:

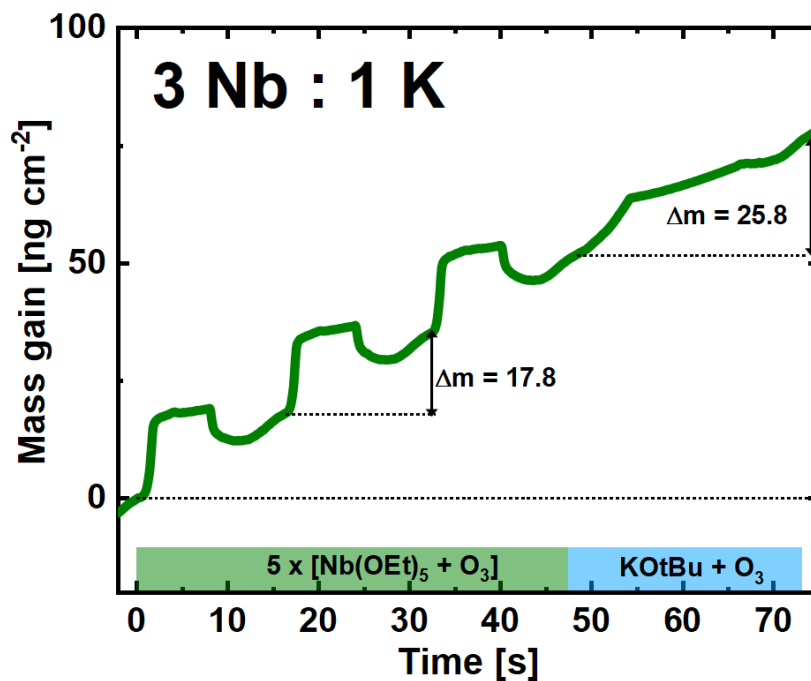

Supplementary Figure B: Quartz crystal microbalance campaign of the 3:1 pulsed Nb:K ratio, showing mass gains for the unique process steps.

### Supplementary Figure C:

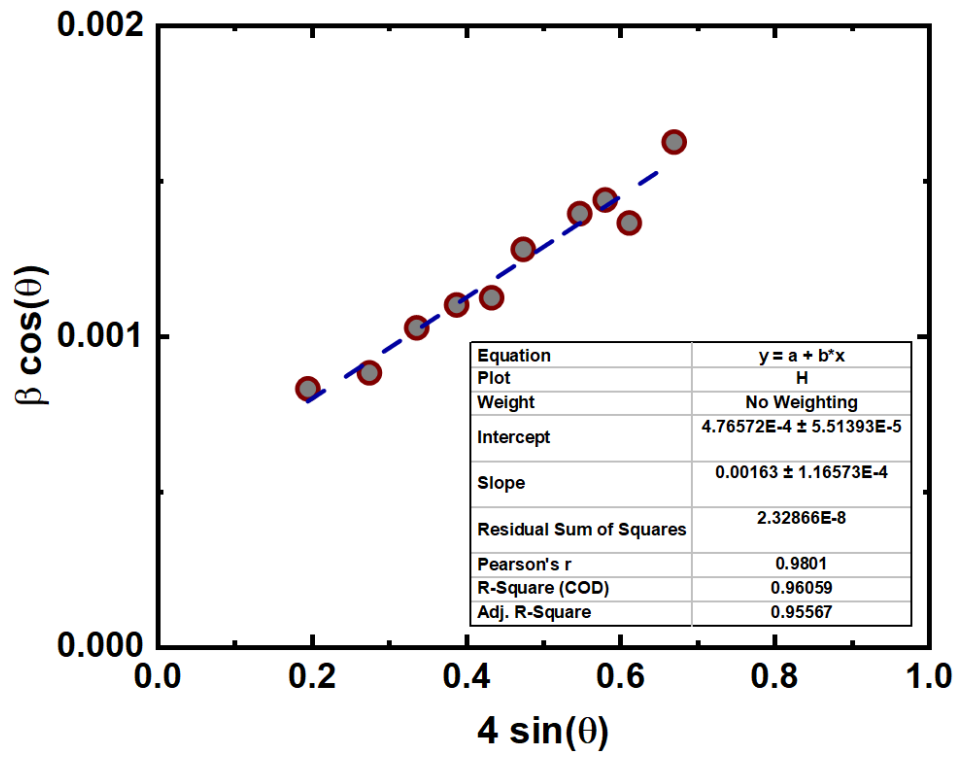

Supplementary Figure C: Williamson-Hall plot for KTN thin films deposited on  $\text{MgAl}_2\text{O}_4$  (100).
